# Supplementary material
Source: PubMed Central journal article supplement (PMC3133630)
Supplement: NIHMS301886-supplement-1_si_001.pdf [file NIHMS301886-supplement-1_si_001.pdf]

# The Influence of Histidine Tag Attachment on Picosecond Protein Dynamics

Megan C. Thielges<sup>+</sup>, Jean K. Chung<sup>+</sup>, Jun Y. Axup<sup>#</sup>, and Michael D. Fayer<sup>+\*</sup>

<sup>+</sup>Department of Chemistry  
Stanford University, Stanford, CA 94305  
[\\*fayer@stanford.edu](mailto:*fayer@stanford.edu)

<sup>#</sup>Department of Chemistry and the Skaggs Institute for Chemical Biology  
The Scripps Research Institute, La Jolla, CA 92037

## Supporting Information: Multiexponential Fits to CLS Decay of MbCO, CD and UV/Visible Spectra of His<sub>6</sub>Mb

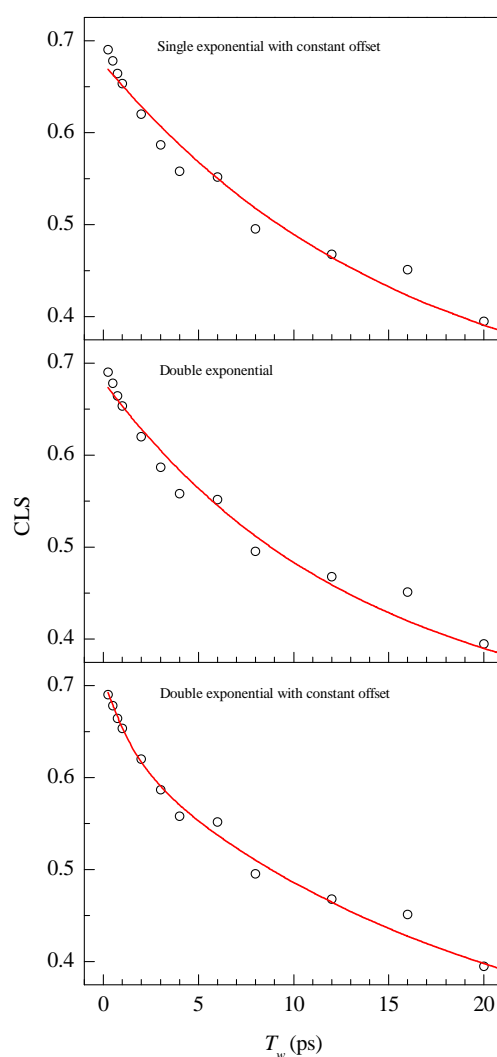

**Figure SI-1:** Multiexponential fits (lines) to CLS decay (symbols) of MbCO. A double exponential fit with a constant offset is necessary to adequately fit the data at the earliest  $T_w$  times. The simpler models clearly miss the short time data points.

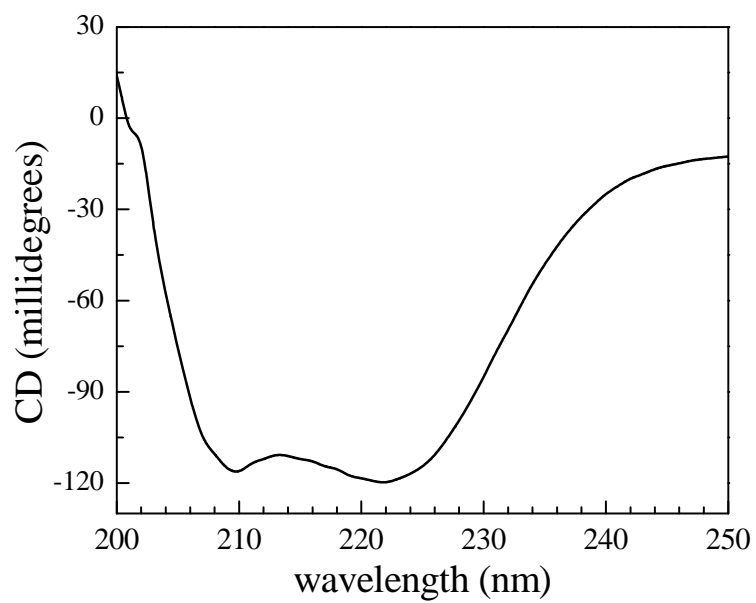

**Figure SI-2:** CD Spectrum of His<sub>6</sub>Mb in PBS/50% glycerol. The spectrum is consistent with the largely alpha helical content of Mb, similar to that observed previously,<sup>1</sup> suggesting the overall folded structure is retained in His<sub>6</sub>MbCO.

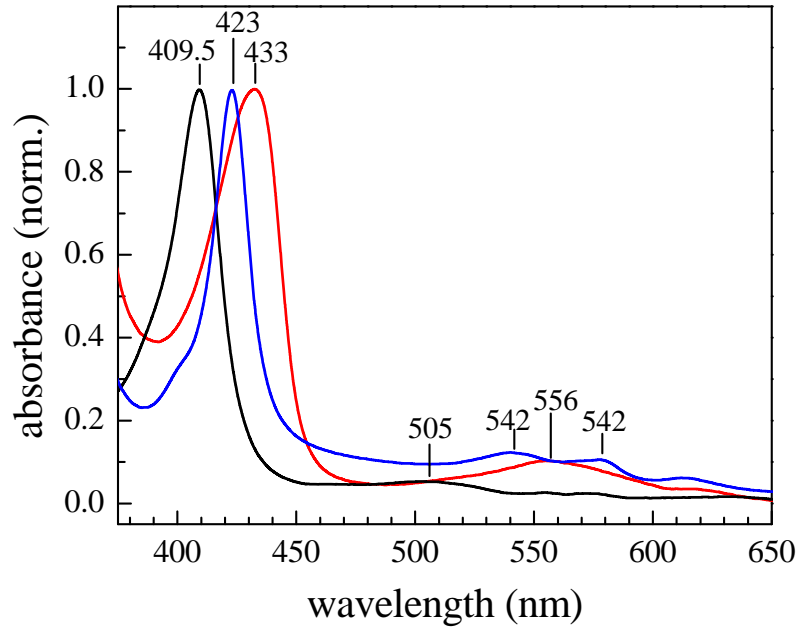

Figure SI-3: UV/Visible spectrum of His<sub>6</sub>Mb in PBS/50% glycerol when oxidized (black), reduced (red), and bound to CO (blue). The frequencies of the Soret and visible bands are the same as previously observed for unmodified sperm whale Mb.<sup>2</sup>

## References

1. Greenfield, N., Fasman, G.D. (1969) Computed circular dichroism spectra for the evaluation of protein conformation, *Biochemistry* 8, 4108-4116.
2. Antonini E. & Brunori M. (1971) *Hemoglobin and Myoglobin in their Reactions with Ligands*, Amsterdam, The Netherlands: North-Holland.
